# Supplementary material for: Emerging Role of Long Non-Coding RNA TDRG1 and ETV4 mRNA as potential biomarkers in Inflammatory Bowel Diseases
Source: Research Square preprint supplement (doi:10.21203/rs.3.rs-6941523/v1), 2025-08-11
Supplement: Supplementary file 1 [file a34dc5f52540846bf9edde23.docx]

**Table (1): Demographic features of the studied groups**

| **Characteristic** | **CD** | **UC** | **Control** |
| --- | --- | --- | --- |
| **Number** | 40 | 40 | 40 |
| **Age (mean in years)** | 32.0 ± 7.98 | 34.23 ± 9.01 | 35.45 ± 6.50 |
| **Gender**  Male (n, %)  Female (n, %) | 14 (35.0%)  26 (65.0%) | 19 (47.5%)  21 (52.5%) | 21 (52.5%)  19 (47.5%) |
| **Smoker** (n, %) | 7 (17.5%) | 10 (25.0%) | 8 (20.0%) |

Data are shown as mean ±SD, CD: Crohn’s disease, UC: Ulcerative colitis, P values are statistically significant at p ≤ 0.05, * significant versus control, ** significant versus CD.

**Table (2): Hematological and Biochemical Findings of the studied groups:**

|  | **CD (n = 40)** | **UC (n = 40)** | **Control (n = 40)** |
| --- | --- | --- | --- |
| **Haemoglobin (g/dl)** | 12.41 ± 1.42 | 10.14 ± 1.67*,** | 12.67 ± 1.26 |
| **WBCs (cell/cmm)** | 7.83 ± 3.16* | 7.90 ± 2.81* | 5.87 ± 1.01 |
| **Platelets (cell)** | 320.1 ± 97.75 | 392.2 ± 101.2**,* | 339.9 ± 103.0 |
| **ESR (mm/hr.)** | 15.35 ± 7.23* | 18.65 ± 10.32* | 6.18 ± 2.09 |
| **CRP (mg/l)** | 7.52 ± 9.84* | 17.20 ± 16.97*,** | 0.69 ± 0.55 |
| **Serum albumin (g/dl)** | 4.19 ± 0.63 | 3.66 ± 0.36*,** | 4.20 ± 0.54 |
| **ALT (U/L)** | 15.90 ± 4.75* | 18.08 ± 3.17*,** | 12.18 ± 2.29 |
| **AST (U/L)** | 15.93 ± 3.98** | 24.23 ± 4.11* | 15.23 ± 3.57 |
| **Urea (in mg/dl)** | 20.13 ± 5.15* | 24.63 ± 3.75*,** | 16.78 ± 4.74 |
| **Serum creatinine (in mg/dl)** | 0.77 ± 0.16* | 0.85 ± 0.15* | 0.64 ± 0.25 |
| **Fecal calprotectin (in ug/g)** | 179.4 ± 173.7* | 446.6 ± 374.2*,** | 51.68 ± 24.75 |

Data are shown as mean ±SD, median (IQR), One-way ANOVA was used for calculating the p-value. P value is statistically significant at p ≤ 0.05, * significant versus control, ** significant versus CD. CD: Crohn’s disease- UC: Ulcerative colitis, WBC: White blood cells, ESR: Erythrocyte sedimentation rate, CRP: C-reactive protein

**Table (3): Laboratory and endoscopic parameters among the active and inactive CD**

|  | **Active CD (n = 20)** | **Inactive CD (n = 20)** | **P** |
| --- | --- | --- | --- |
| **Haemoglobin (g/dl)** | 12.80 ± 1.64 | 12.03 ± 1.07 | 0.088 |
| **WBCs** | 7.99 ± 3.90 | 7.67 ± 2.30 | 0.678 |
| **Platelets** | 319.5 ± 109.7 | 320.6 ± 87.06 | 0.972 |
| **ESR (mm/hr.)** | 21.45 ± 4.55 | 9.25 ± 2.86 | <0.001* |
| **CRP (mg/l)** | 13.25 ± 11.34 | 1.79 ± 0.91 | <0.001* |
| **Serum albumin (g/dl)** | 4.38 ± 0.56 | 4.01 ± 0.66 | 0.035* |
| **ALT (U/L)** | 18.15 ± 4.45 | 13.65 ± 3.98 | 0.001* |
| **AST (U/L)** | 17.25 ± 4.44 | 14.60 ± 3.03 | 0.056 |
| **Fecal calprotectin (ug/g)** | 342.0 (214.50 – 418.0) | 38.0 (30.50 – 44.50) | <0.001* |
| **lncRNA TDRG1** | 385.1 (93.50 – 1123.6) | 21.11 (0.69 – 566.4) | 0.011* |
| **ETV4 mRNA** | 136.1 (77.75 – 270.2) | 6.93 (0.33 – 70.29) | 0.003* |

Data are shown as mean ±SD, median (IQR). T test was used for calculating the p-value. P value is statistically significant at p ≤ 0.05, * significant versus active CD

**Table (4): Laboratory and endoscopic parameters among the active and inactive UC**

|  | **Active UC (n = 20)** | **Inactive UC (n = 20)** | **p** |
| --- | --- | --- | --- |
| **Haemoglobin (g/dl)** | 8.85 ± 1.18 | 11.43 ± 0.92 | <0.001* |
| **WBCs ( c/cmm)** | 9.33 ± 2.40 | 6.48 ± 2.49 | 0.001* |
| **Platelets (mean/ml)** | 459.3 ± 76.39 | 325.2 ± 75.55 | <0.001* |
| **ESR (mm/hr.)** | 25.0 ± 10.58 | 12.30 ± 4.67 | <0.001* |
| **CRP (mg/l)** | 27.90 ± 17.38 | 6.51 ± 6.92 | <0.001* |
| **Serum albumin (g/dl)** | 3.40 ± 0.31 | 3.93 ± 0.16 | <0.001* |
| **ALT ( in U/L)** | 18.05 ± 3.07 | 18.10 ± 3.34 | 0.925 |
| **AST ( U/L)** | 24.10 ± 3.85 | 24.35 ± 4.45 | 0.947 |
| **Faecal calprotectin (ug/g)** | 735.0 (470.0 – 950.0) | 82.50 (45.0 – 255.0) | <0.001* |
| **lncRNA TDRG1**  **(min-max)**  **median** | 117.3-59288.3  3212.4(488.5–5940.9) | 4.67-18356.5  3017.2(728.2–5112.7) | 0.547 |
| **ETV4 mRNA**  **(Min-max)**  **Median** | 17.32-39347.9  647.0 (203.4 – 1183.8) | 8.66-3753.4  630.2(277.1 – 1112.0) | 0.947 |

Data are shown as mean ±SD, median (IQR), t test was used for calculating the p-value. P value is statistically significant at p ≤ 0.05, * significant versus active UC

**Table (5): Correlation between (lncRNA TDRG1 and ETV4 mRNA) and other parameters in CD patients**

|  | **LncRNA TDRG1** | | **ETV4 mRNA** | |
| --- | --- | --- | --- | --- |
| **rs** | **p** | **rs** | **P** |
| **LncRNA TDRG1** |  |  | 0.713* | <0.001* |
| **ESR (mm/hr.)** | 0.313* | 0.049* | 0.372* | 0.018* |
| **CRP (mg/l)** | 0.358* | 0.023* | 0.374* | 0.017* |
| **F. calprotectin (ug/g)** | 0.431* | 0.006* | 0.523* | 0.001* |
| **HBI** | 0.323* | 0.042* | 0.325* | 0.041* |
| **SES-CD** | 0.374* | 0.017* | 0.396* | 0.011* |
| **Serum albumin (g/dl)** | 0.310 | 0.051 | 0.150 | 0.355 |
| **WBCs** | -0.169 | 0.296 | -0.142 | 0.381 |
| **Hemoglobin (g/dl)** | 0.202 | 0.211 | 0.116 | 0.477 |

rs: Spearman coefficient *: Statistically significant at p ≤ 0.05

**Table (6): Correlation between (lncRNA TDRG1 and ETV4 mRNA) and other disease activity parameters in UC patients**

|  | **lncRNA TDRG1** | | **ETV4 mRNA** | |
| --- | --- | --- | --- | --- |
| **rs** | **p** | **rs** | **P** |
| **LncRNA TDRG1** |  |  | 0.647* | <0.001* |
| **ESR (mm/hr.)** | 0.116 | 0.476 | 0.102 | 0.531 |
| **CRP (mg/l)** | 0.082 | 0.614 | 0.073 | 0.653 |
| **F. calprotectin (ug/g)** | 0.063 | 0.701 | 0.122 | 0.453 |
| **Mayo score** | 0.062 | 0.704 | 0.071 | 0.662 |
| **Mayo sub score** | 0.055 | 0.735 | 0.105 | 0.519 |
| **UCEIS** | 0.026 | 0.872 | 0.086 | 0.599 |
| **Serum albumin (g/dl)** | -0.042 | 0.799 | -0.126 | 0.437 |
| **WBCs** | -0.190 | 0.241 | -0.147 | 0.365 |
| **Hemoglobin (g/dl)** | -0.046 | 0.779 | 0.030 | 0.854 |

rs: Spearman coefficient *: Statistically significant at p ≤ 0.05

**Table (7): Diagnostic performance of lncRNA TDRG1 and ETV4 mRNA to discriminate patients having inflammatory bowel disease (n = 80) from healthy controls (n = 40)**

|  | **AUC** | **p** | **95% C.I** | **Cut off#** | **Sensitivity** | **Specificity** | **PPV** | **NPV** |
| --- | --- | --- | --- | --- | --- | --- | --- | --- |
| **LncRNA TDRG1** | 0.923 | <0.001* | 0.877 – 0.970 | >106.5# | 75 | 92.5 | 95.2 | 64.9 |
| **ETV4 mRNA** | 0.899 | <0.001* | 0.844 – 0.954 | >3.77# | 88.75 | 85 | 92.2 | 79.1 |
| **Combined LncRNA TDRG1& ETV4 mRNA** | 0.933 | <0.001* | 0.888 – 0.977 | ---- | 92.5 | 85 | 92.5 | 85 |

AUC: Area Under a Curve p value: Probability value CI: Confidence Intervals

NPV: Negative predictive value PPV: Positive predictive value

*: Statistically significant at p ≤ 0.05

#Cut off was choose according to Youden index

**Table (8): Diagnostic performance of lncRNA TDRG1 and ETV4 mRNA to discriminate active Crohn’s disease (n = 20) from inactive Crohn’s disease (n = 20)**

|  | **AUC** | **P** | **95% C.I** | **Cut off#** | **Sensitivity** | **Specificity** | **PPV** | **NPV** |
| --- | --- | --- | --- | --- | --- | --- | --- | --- |
| **LncRNA TDRG1** | 0.732 | 0.012* | 0.575 – 0.890 | >106.5 | 75.0 | 65.0 | 68.2 | 72.2 |
| **ETV4 mRNA** | 0.768 | 0.004* | 0.607 – 0.928 | >18.30 | 85.0 | 75.0 | 77.3 | 83.3 |
| **Combined**  **lncRNA TDRG1 & ETV4 mRNA** | 0.763 | 0.005* | 0.603 – 0.922 | ----- | 95.0 | 65.0 | 73.1 | 92.9 |

AUC: Area Under a Curve p value: Probability value CI: Confidence Intervals

NPV: Negative predictive value PPV: Positive predictive value

*: Statistically significant at p ≤ 0.05

#Cut off was choose according to Youden index
